# Supplementary material
Source: ML conference proceedings conference paper supplement (https://openaccess.thecvf.com/content/ICCV_2019/html/Chang_Deep_Optics_for_ICCV_2019_paper.html)
Supplement: Supplementary file 1 [file Chang_Deep_Optics_for_ICCV_2019_supplemental.zip]

Archive with 12 entries (9 files):
- 1439-supp/
- 1439-supp/.DS_Store
- __MACOSX/
- __MACOSX/1439-supp/
- __MACOSX/1439-supp/._.DS_Store
- 1439-supp/1439-supp.pdf
- __MACOSX/1439-supp/._1439-supp.pdf
- 1439-supp/kitti_3dobject_comparison.mp4
- __MACOSX/1439-supp/._kitti_3dobject_comparison.mp4
- 1439-supp/kitti_depth_opt-lens.mp4
- __MACOSX/1439-supp/._kitti_depth_opt-lens.mp4
- __MACOSX/._1439-supp
